# Supplementary material
Source: PubMed Central journal article supplement (PMC6777919)
Supplement: jciinsight-4-122688-s224.pdf [file jciinsight-4-122688-s224.pdf]

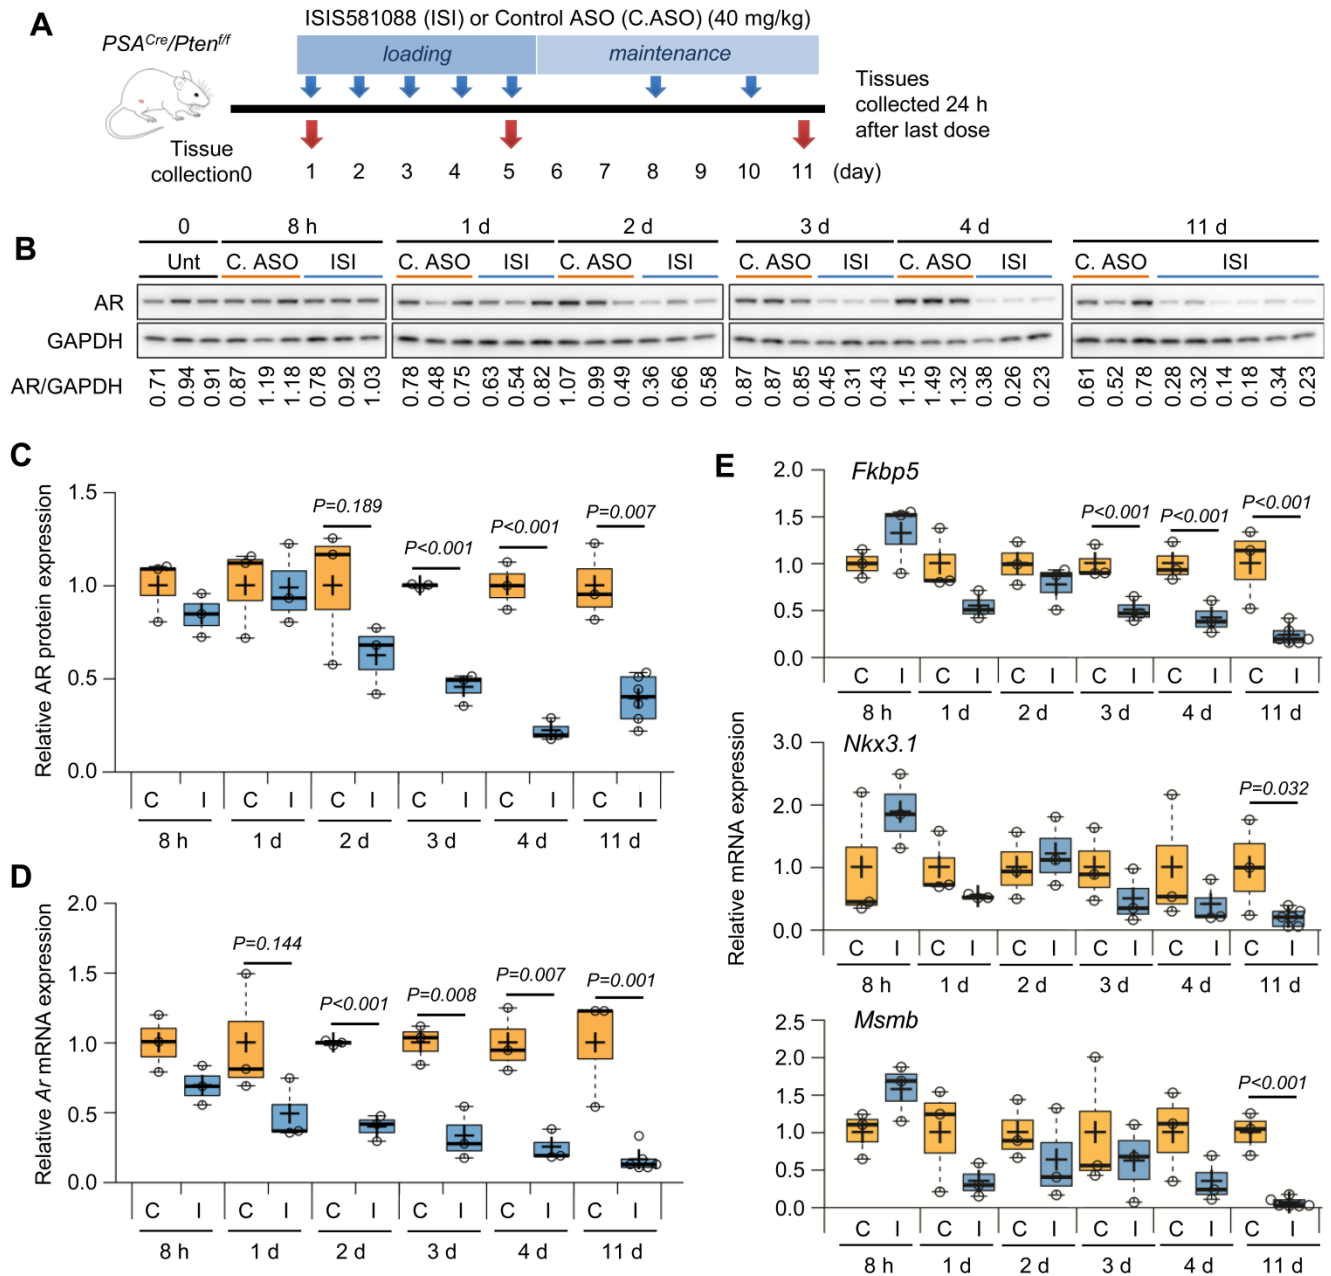

**Supplemental Figure 1. Pharmacodynamic activity of ISIS581088 in mouse prostate tumors.** (A) Schematic for ASO dosing and tissue collection. (B) AR protein expression analysis by western blot and relative density quantified with ImageJ. Comparison of western blot AR protein (C) and qRT-PCR Ar mRNA levels (D) and AR target genes (E) in prostate tumors after treatment with control ASO (C) or ISIS581088 (I). Center lines represent medians; box limits indicate the 25th and 75th percentiles; crosses represent sample means; data points are plotted as open circles, n=3-6 mice/group. Significance represents Student's t-test for comparisons between control ASO and ISIS581088.

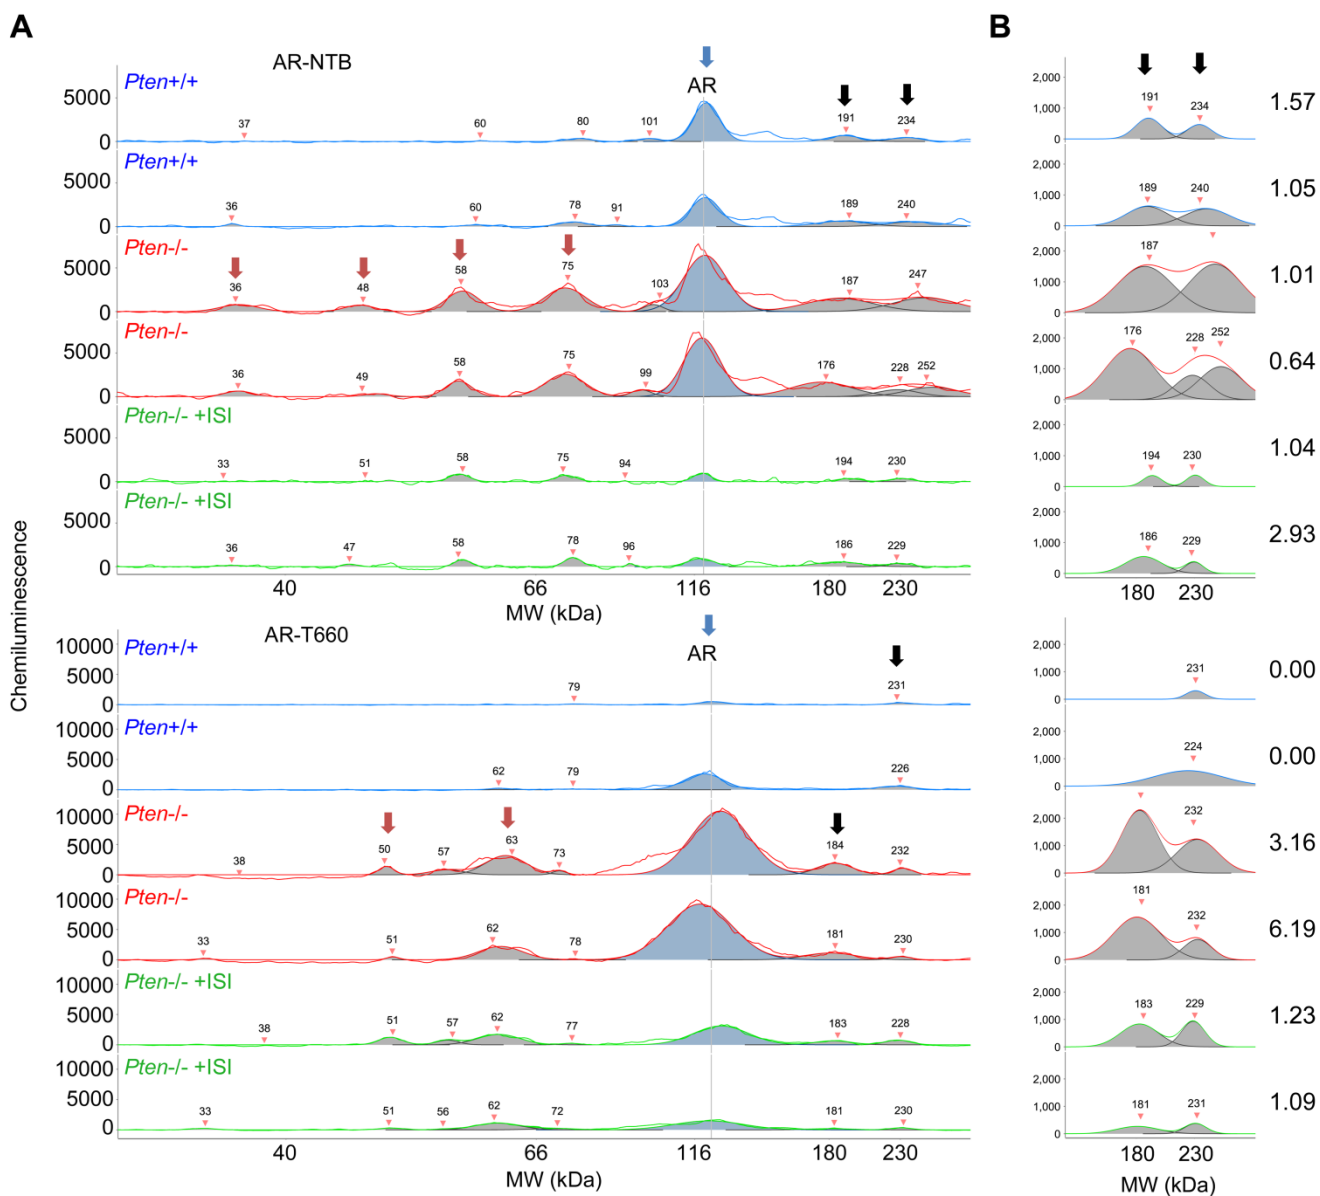

**Supplemental Figure 2. Expression profiles AR protein mouse prostate.** (A) Individual electropherograms of AR isoforms corresponding to Figure 2A-B by automated capillary electrophoresis using AR antibodies targeting the N-terminal domain (AR-NTB) or the ligand binding domain (AR-LBD). AR-FL, putative AR-Vs and high molecular weight bands are represented by blue, red and black arrows, respectively. Shaded areas in the electropherogram denote peaks after baseline correction. (B) Enhanced view of individual electropherograms of high molecular AR peaks showing fit baseline corrected peaks and the ratio of AUC for 180/230 kDa peaks.

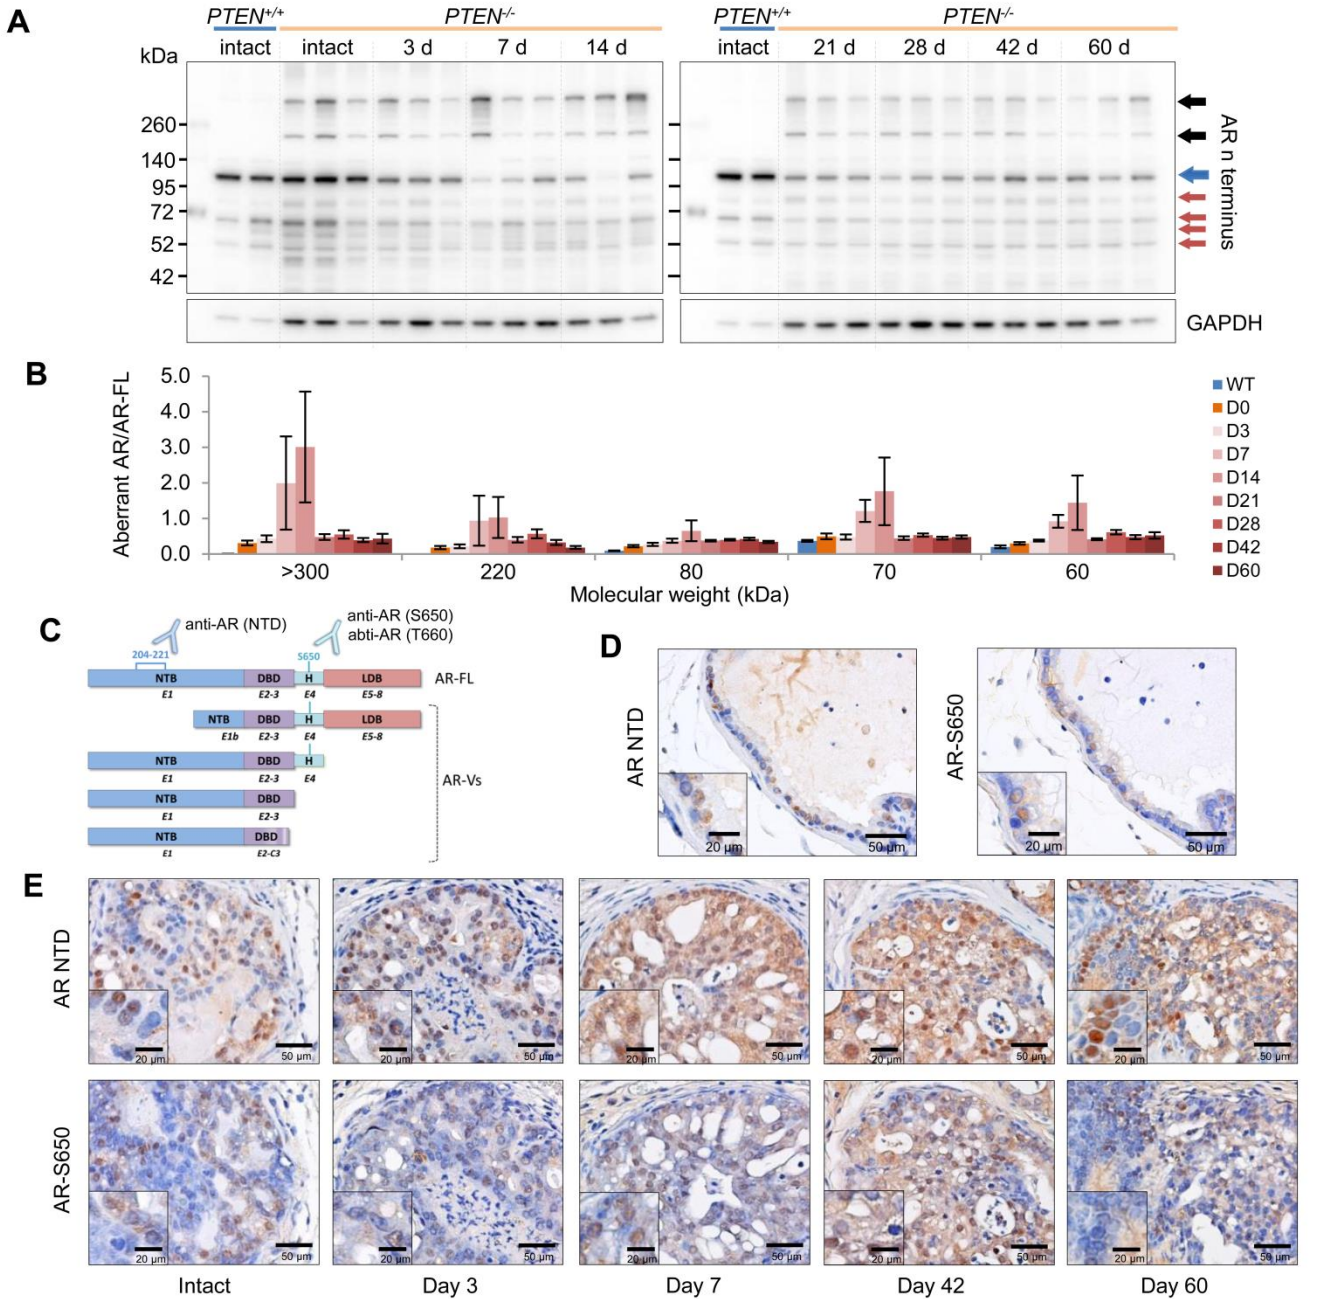

**Supplemental Figure 3. Expression of full length AR and putative splice variants in mouse *Pten*-deficient prostate tumors.** (A) Analysis of full-length AR and aberrant AR in mouse prostate tumors by western blot analysis using an AR antibody targeting the n-terminal domain (AR-NTD). Prostate tumors were collected from intact 25-week-old conditional *Pten*-KO mice and following surgical castration as indicated. Normal prostate tissue from age 20-week-old wildtype *Pten* mice was used as a normal reference and GAPDH was used as loading control. The blue arrow indicated AR-FL and putative AR-Vs are marked with red arrows and high molecular weight bands with black arrows. (B) Aberrant AR/AR-FL ratio from densitometric analysis of the immunoblots in (A). (C) Schematic for immune detection of AR-FL and putative AR-Vs by immunohistochemistry. AR-NTD antibody detects AR-FL and AR-Vs, while AR-650 detects AR-FL but not truncated AR-Vs lacking the hinge region and ligand binding domain (LBD). Representative photomicrographs of serial sections normal mouse prostate (D) and intact prostate tumors and prostate tumors post-surgical castration (E) immunostained with AR-NTD and AR-S650 antibodies. Scale bars represent 50  $\mu$ m.

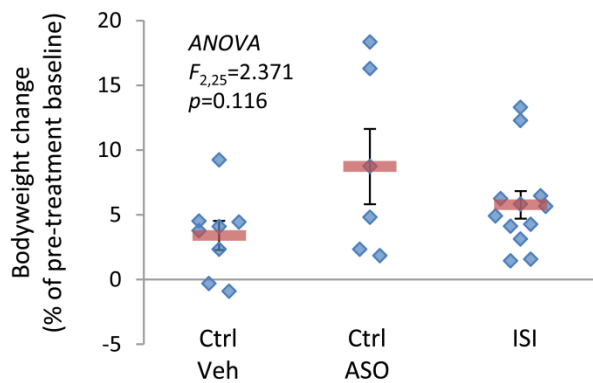

**Supplemental Figure 4. Safety and tolerability of *Ar*-ASO administration in conditional *Pten*-KO mice.** Mouse bodyweight changes after treatment with vehicle ( $n=8$ ), control ASO ( $n=6$ ) or ISIS581088 ( $n=12$ ). Control ASO and ISIS581088 were administered i.p. for four weeks (40 mg/kg/d for first week loading followed by three weeks of maintenance dosing, 40 mg/kg 3X/week), mice four weeks after surgical castration (Orch,  $n=8$ ). Horizontal bars represent mean  $\pm$  s.e. and diamonds represent individual mice.

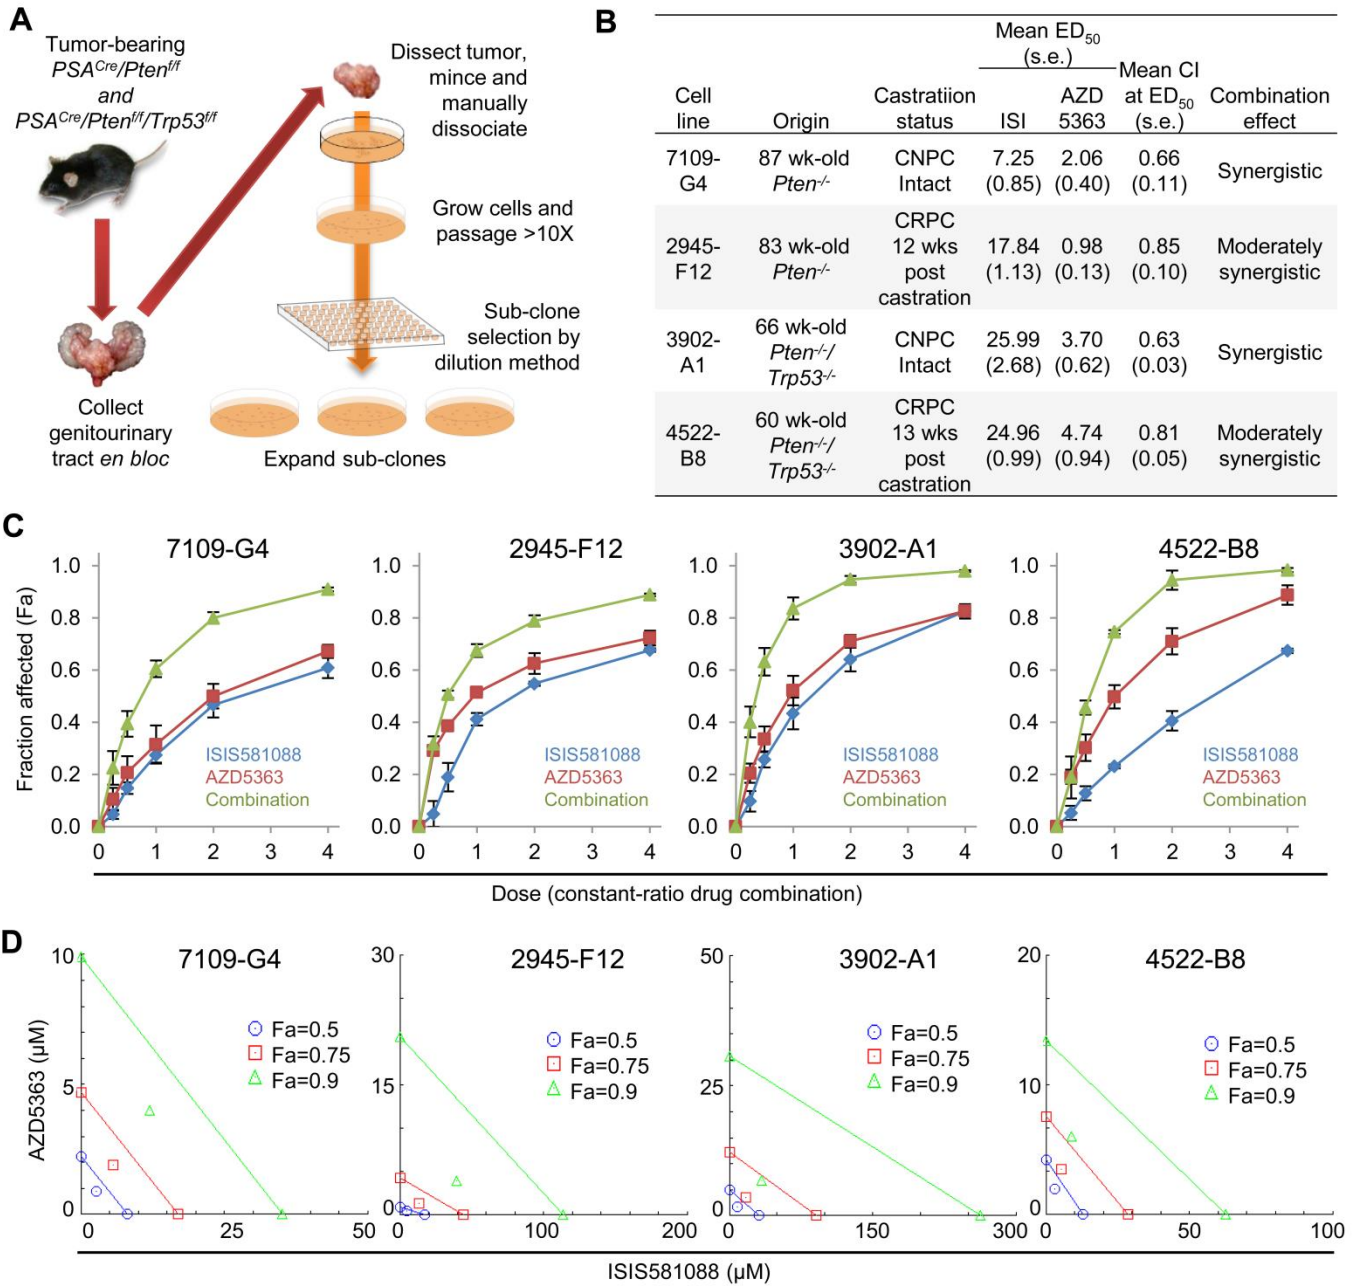

**Supplemental Figure 5. *In vitro* efficacy determination of combination therapy with ISIS581088 and AZD5363 mouse *Pten*-deficient prostate cancer lines. (A) Schematic for the establishment of mouse prostate cancer cell lines. (B) Summary of drug sensitivity (effective dose requiring 50% growth inhibition ( $ED_{50}$ )) and synergy measured by the Chou-Talalay combination index (CI). Dose-effect curves of ISIS581088 and AZD5363 combination therapy in mouse prostate cancer cell lines (C) and representative isobolograms for the constant-ratio design (D). Data represent mean values of three independent experiments performed in quadruplicate.**



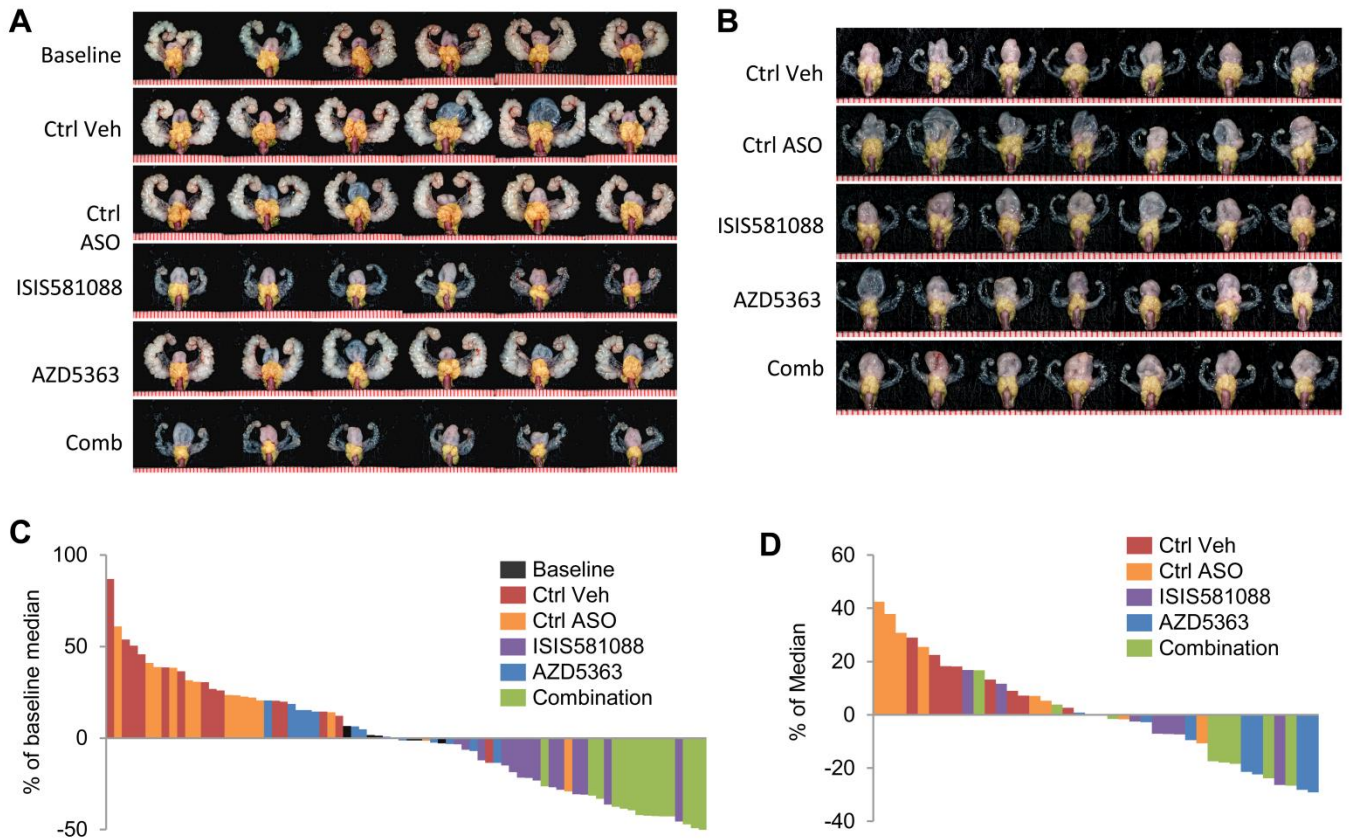

**Supplemental Figure 6. Efficacy determination of *in vivo* combination therapy with ISIS581088 and AZD5363 in mouse *Pten*-deficient prostate cancer models.** Representative images of genitourinary tracts (A) and waterfall plot (C) to the indicated treatments of mice in Figure 7A are shown. Representative images of genitourinary tracts (B) and waterfall plot (D) to the indicated treatments of mice in Figure 7D are shown. Prostate tumors are highlighted by a yellow mask, scale represents mm. Waterfall plot of individual treatment response based on tumor area normalized to median baseline or vehicle control.

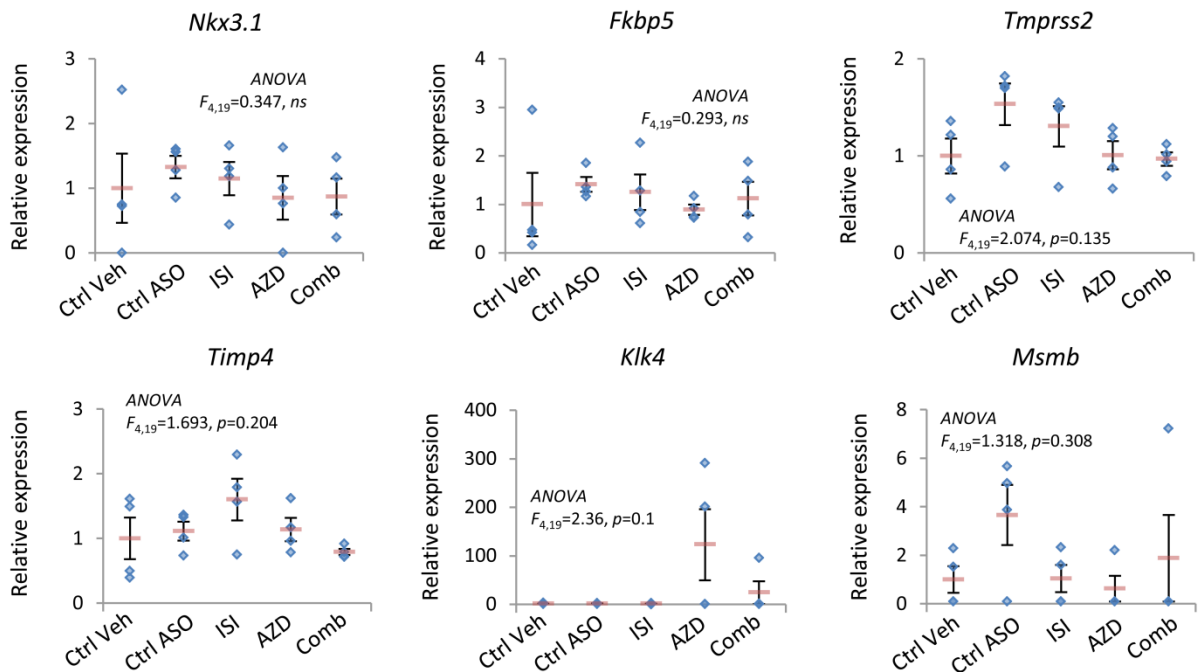

**Supplemental Figure 7. mRNA expression of AR-responsive genes in CRPC after combination therapy with ISIS581088 and AZD5363.** qRT-PCR analysis of mRNA of core AR-responsive genes in prostate tumors from Figure 8D. Horizontal bars represent mean  $\pm$  s.e. and diamonds represent individual samples,  $n=4$  mice/group.

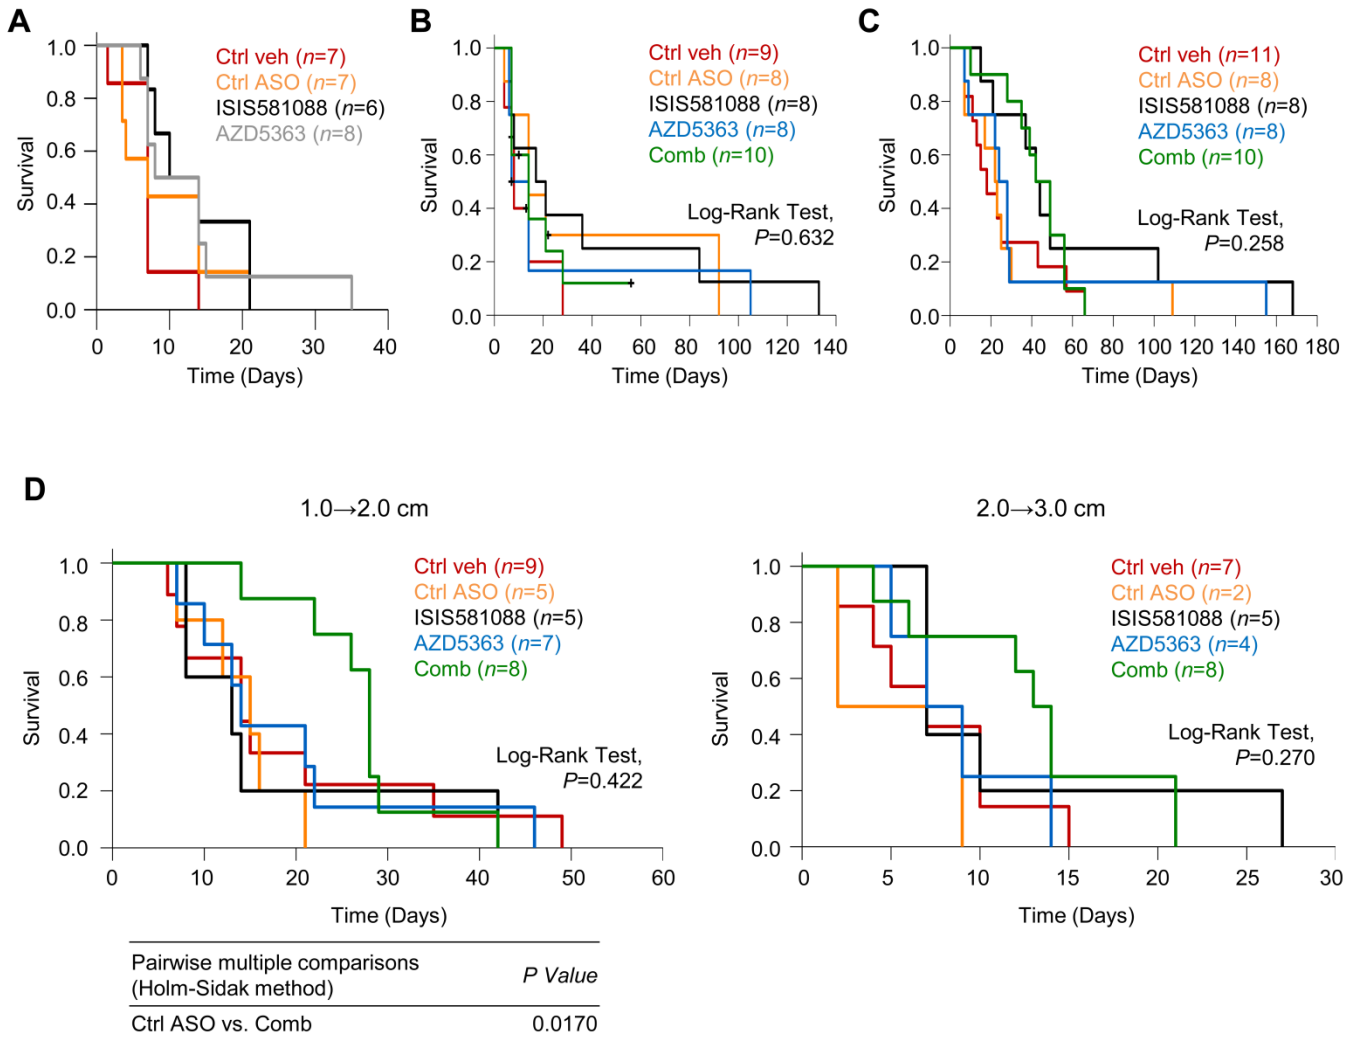

**Supplemental Figure 8. Combined AR and PI3K/AKT blockade suppresses cancer growth and improves survival in a mouse model of advanced castration-resistant prostate cancer (CRPC).** Kaplan-Meier plots showing progression-free survival curves for mice in Fig. 10 after the indicated treatment in castration-naive (A) and CRPC (B) settings. (C) Kaplan-Meier plots showing overall survival after treatment randomization of mice in Fig. 10c. (D) Kaplan-Meier plots showing time to tumor growth in the CRPC setting (palpable tumor size from 1 to 2 cm and 2 to 3 cm).



Supplementary Table 1. ASO uptake in surrounding tissues

| Group      | Time | Dose (mg/kg) | No. of mice | Normal prostate glands |              | Anterior prostate (Coagulating gland) | Urothelium | Connective tissue |              | Skeletal muscle | Peri-urethral gland | Seminal vesicle |
|------------|------|--------------|-------------|------------------------|--------------|---------------------------------------|------------|-------------------|--------------|-----------------|---------------------|-----------------|
|            |      |              |             | Dorsal lobe            | Ventral lobe |                                       |            | Macro phages      | Fibro blasts |                 |                     |                 |
| Baseline   | 0    | 0            | 4           | -                      | -            | -                                     | -          | -                 | -            | -               | -                   | -               |
| Ctrl ASO   | 24   | 40           | 2           | -                      | +/-          | +/-                                   | +          | +++               | ++           | +/-             | ++                  | +               |
| Ctrl ASO   | 96   | 40           | 2           | +/-                    | +            | -                                     | +          | +++               | ++           | -               | +                   | +               |
| ISIS581088 | 2    | 40           | 2           | -                      | -            | -                                     | +/-        | +++               | +            | +/-             | np                  | +               |
| ISIS581088 | 4    | 40           | 2           | -                      | +/-          | -                                     | -          | +++               | ++           | +/-             | +/-                 | +               |
| ISIS581088 | 8    | 40           | 2           | -                      | +            | -                                     | +/-        | ++                | ++           | -               | np                  | +               |
| ISIS581088 | 24   | 40           | 2           | -                      | +            | -                                     | +          | +++               | ++           | -               | np                  | +               |
| ISIS581088 | 48   | 40           | 2           | -                      | +/-          | -                                     | +          | +++               | +            | -               | +/-                 | +               |
| ISIS581088 | 76   | 40           | 2           | -                      | +            | -                                     | +          | +++               | ++           | -               | +/-                 | np              |
| ISIS581088 | 96   | 40           | 2           | +/-                    | +            | -                                     | ++         | +++               | ++           | -               | +                   | +               |

np (not present), - negative, +/- slight, + minimal ++ mild +++ moderate

Supplementary Table 2. One way ANOVA analysis for qRT-PCR-based panel Ar , core AR responsive, AR stimulating, proliferation and apoptosis genes.

| Gene               | BL mean | BL sd | Veh mean | Veh sd | ISI mean | ISI sd | Cast mean | Cast sd | Enz mean | Enz sd | Apa mean | Apa sd | Abi mean | Abi sd | CMA mean | CMA sd | F ratio | Sum of squares (groups) | Sum of squares (error) | degrees of freedom (groups) | degrees of freedom (error) | Raw p-Value |
|--------------------|---------|-------|----------|--------|----------|--------|-----------|---------|----------|--------|----------|--------|----------|--------|----------|--------|---------|-------------------------|------------------------|-----------------------------|----------------------------|-------------|
| <i>Ar Ex5-Ex6J</i> | 0.424   | 0.326 | -0.043   | 0.206  | -2.171   | 0.072  | 0.513     | 0.627   | 0.808    | 0.405  | -0.149   | 0.423  | 0.874    | 0.337  | -0.256   | 0.670  | 20.988  | 26.647                  | 4.353                  | 7.0                         | 24.0                       | 8.74E-09    |
| <i>Ar-Ex2</i>      | -0.074  | 0.279 | -0.264   | 0.119  | -1.965   | 0.079  | 0.704     | 0.236   | 1.075    | 0.712  | -0.268   | 0.342  | 0.750    | 0.701  | 0.041    | 0.877  | 13.957  | 24.886                  | 6.114                  | 7.0                         | 24.0                       | 4.41E-07    |
| <i>Ar-Ex7</i>      | -0.100  | 0.179 | -0.162   | 0.031  | -2.112   | 0.087  | 0.603     | 0.314   | 0.965    | 0.538  | -0.007   | 0.416  | 0.759    | 0.691  | 0.054    | 0.873  | 15.808  | 25.475                  | 5.525                  | 7.0                         | 24.0                       | 1.38E-07    |
| <i>Casp3</i>       | 0.962   | 0.860 | -0.266   | 0.523  | -1.195   | 0.598  | -0.404    | 0.535   | 0.214    | 0.595  | 0.129    | 0.633  | -0.637   | 0.331  | 1.195    | 1.353  | 4.709   | 17.939                  | 13.061                 | 7.0                         | 24.0                       | 1.93E-03    |
| <i>Mki67</i>       | -0.785  | 0.190 | 0.298    | 0.809  | 1.260    | 0.632  | 1.384     | 0.718   | -1.141   | 0.143  | 0.037    | 0.479  | -0.859   | 0.161  | -0.194   | 0.264  | 14.733  | 25.148                  | 5.852                  | 7.0                         | 24.0                       | 2.67E-07    |
| <i>Myc</i>         | 1.104   | 0.604 | -1.110   | 0.250  | -1.124   | 0.464  | -0.175    | 0.372   | 1.154    | 0.828  | -0.112   | 0.589  | 0.717    | 0.844  | -0.455   | 0.241  | 10.274  | 23.244                  | 7.756                  | 7.0                         | 24.0                       | 6.57E-06    |
| <i>Nkx3.1</i>      | 0.709   | 0.812 | 0.553    | 0.863  | -0.503   | 0.616  | -1.033    | 0.032   | 0.783    | 0.814  | -0.718   | 0.227  | 0.545    | 1.617  | -0.336   | 0.577  | 3.079   | 14.668                  | 16.332                 | 7.0                         | 24.0                       | 1.84E-02    |
| <i>Stat3</i>       | 1.246   | 0.574 | -0.889   | 0.428  | -1.205   | 0.374  | -0.224    | 0.487   | 1.179    | 0.765  | -0.597   | 0.441  | 0.503    | 0.358  | -0.013   | 0.863  | 10.498  | 23.368                  | 7.632                  | 7.0                         | 24.0                       | 5.48E-06    |
| <i>Fkbp5</i>       | 0.769   | 0.684 | 0.843    | 0.421  | -1.073   | 0.080  | -1.147    | 0.082   | 1.371    | 0.704  | -0.862   | 0.160  | 0.364    | 0.558  | -0.265   | 0.220  | 19.581  | 26.381                  | 4.619                  | 7.0                         | 24.0                       | 1.74E-08    |
| <i>Igf1r</i>       | 1.319   | 0.659 | -0.669   | 0.388  | -1.053   | 0.156  | 0.110     | 0.164   | 0.724    | 1.273  | -0.679   | 0.478  | 0.234    | 0.901  | 0.013    | 1.113  | 4.383   | 17.395                  | 13.605                 | 7.0                         | 24.0                       | 2.95E-03    |
| <i>Msmb</i>        | 0.037   | 0.612 | 1.022    | 0.917  | -0.529   | 0.185  | -0.736    | 0.000   | 1.388    | 1.733  | -0.450   | 0.096  | -0.237   | 0.405  | -0.496   | 0.419  | 4.272   | 17.197                  | 13.803                 | 7.0                         | 24.0                       | 3.42E-03    |
| <i>Timp4</i>       | 0.711   | 0.317 | 1.666    | 1.233  | -0.874   | 0.038  | -0.899    | 0.027   | 0.605    | 0.468  | -0.699   | 0.252  | 0.166    | 0.405  | -0.677   | 0.060  | 13.658  | 24.780                  | 6.220                  | 7.0                         | 24.0                       | 5.37E-07    |
| <i>Tmprss2</i>     | 0.897   | 0.345 | 0.103    | 0.883  | -1.282   | 0.315  | -0.799    | 0.160   | 1.255    | 0.914  | -0.757   | 0.478  | 0.580    | 0.533  | 0.004    | 0.719  | 8.835   | 22.333                  | 8.667                  | 7.0                         | 24.0                       | 2.28E-05    |
| <i>Bcl2</i>        | -0.236  | 0.816 | -0.652   | 0.783  | 0.442    | 1.166  | 0.837     | 1.409   | 0.551    | 0.881  | -0.902   | 0.737  | 0.529    | 0.435  | -0.570   | 0.266  | 2.283   | 12.391                  | 18.609                 | 7.0                         | 24.0                       | 6.22E-02    |
| <i>Klk4</i>        | 0.609   | 1.916 | -0.303   | 0.039  | -0.342   | 0.022  | -0.265    | 0.144   | 0.629    | 1.903  | -0.284   | 0.084  | -0.313   | 0.037  | 0.269    | 1.133  | 0.689   | 5.186                   | 25.814                 | 7.0                         | 24.0                       | 6.81E-01    |
| <i>Igf1</i>        | 0.117   | 0.624 | -0.395   | 0.405  | -0.116   | 1.079  | 0.079     | 1.467   | 0.164    | 0.313  | -0.679   | 0.170  | 0.668    | 1.414  | 0.162    | 1.675  | 0.597   | 4.599                   | 26.401                 | 7.0                         | 24.0                       | 7.52E-01    |

Supplementary Table 3. Fold changes of mRNA expression of AR-dependent genes in mouse *Pten*-deficient prostate cancer

| Gene           | CNPC                           |             |                     |             | CRPC                           |             |                     |             |
|----------------|--------------------------------|-------------|---------------------|-------------|--------------------------------|-------------|---------------------|-------------|
|                | Linear fold change vs Ctrl Unt |             | p-Value vs Ctrl Unt |             | Linear fold change vs Ctrl Unt |             | p-Value vs Ctrl Unt |             |
|                | Ctrl ASO                       | ISIS 581088 | Ctrl ASO            | ISIS 581088 | Ctrl ASO                       | ISIS 581088 | Ctrl ASO            | ISIS 581088 |
| <i>Abcc4</i>   | 1.033                          | 0.890       | 0.903               | 0.669       | 0.856                          | 0.799       | 0.663               | 0.549       |
| <i>Abo</i>     | 1.389                          | 0.198       | 0.380               | 0.001       | 0.244                          | 0.250       | 0.412               | 0.528       |
| <i>Actg2</i>   | 0.757                          | 0.469       | 0.687               | 0.308       | 0.461                          | 0.197       | 0.279               | 0.051       |
| <i>Aldh1l2</i> | 0.425                          | 0.360       | 0.032               | 0.013       | 0.504                          | 0.572       | 0.088               | 0.173       |
| <i>Alox12</i>  | 0.660                          | 0.914       | 0.337               | 0.833       | 0.960                          | 0.639       | 0.950               | 0.494       |
| <i>Ank1</i>    | 0.569                          | 0.624       | 0.194               | 0.272       | 0.972                          | 0.516       | 0.950               | 0.153       |
| <i>Ar</i>      | 0.696                          | 0.068       | 0.257               | 0.000       | 0.865                          | 0.157       | 0.575               | 0.000       |
| <i>B4Gal5</i>  | 0.561                          | 0.505       | 0.050               | 0.023       | 0.719                          | 0.748       | 0.170               | 0.223       |
| <i>C1qc</i>    | 0.643                          | 1.163       | 0.379               | 0.740       | 0.788                          | 0.924       | 0.806               | 0.932       |
| <i>Camkk2</i>  | 0.880                          | 0.923       | 0.844               | 0.894       | 0.388                          | 0.449       | 0.211               | 0.229       |
| <i>Chka</i>    | 1.064                          | 0.788       | 0.770               | 0.269       | 0.911                          | 0.864       | 0.624               | 0.443       |
| <i>Crabp1</i>  | 1.076                          | 0.194       | 0.862               | 0.001       | 0.322                          | 0.357       | 0.051               | 0.072       |
| <i>Creld2</i>  | 0.856                          | 0.580       | 0.552               | 0.051       | 0.870                          | 0.912       | 0.573               | 0.708       |
| <i>Cxcl11</i>  | 0.846                          | 2.594       | 0.778               | 0.127       | 0.742                          | 0.458       | 0.481               | 0.128       |
| <i>Cxcl17</i>  | 0.584                          | 1.145       | 0.479               | 0.858       | 0.954                          | 0.508       | 0.944               | 0.322       |
| <i>Cyp2f2</i>  | 0.877                          | 1.260       | 0.604               | 0.366       | 0.866                          | 0.666       | 0.712               | 0.305       |
| <i>Dbi</i>     | 0.950                          | 0.600       | 0.900               | 0.218       | 0.922                          | 0.897       | 0.689               | 0.591       |
| <i>Derl3</i>   | 0.562                          | 0.266       | 0.122               | 0.002       | 0.883                          | 0.693       | 0.582               | 0.121       |
| <i>Dhcr24</i>  | 0.871                          | 0.449       | 0.710               | 0.044       | 0.985                          | 0.918       | 0.948               | 0.717       |
| <i>Dhcr7</i>   | 0.846                          | 0.634       | 0.302               | 0.011       | 0.968                          | 0.992       | 0.895               | 0.975       |
| <i>Dnajc3</i>  | 1.010                          | 0.544       | 0.978               | 0.100       | 0.890                          | 0.866       | 0.584               | 0.499       |
| <i>Doc2b</i>   | 1.256                          | 0.236       | 0.500               | 0.001       | 0.858                          | 0.816       | 0.602               | 0.491       |
| <i>Epas1</i>   | 0.713                          | 0.516       | 0.305               | 0.056       | 0.848                          | 0.841       | 0.535               | 0.513       |
| <i>Epn2</i>    | 1.122                          | 0.556       | 0.710               | 0.107       | 0.880                          | 0.860       | 0.619               | 0.576       |
| <i>Erp44</i>   | 1.061                          | 0.807       | 0.733               | 0.230       | 0.967                          | 0.935       | 0.862               | 0.730       |
| <i>Fas</i>     | 0.724                          | 0.831       | 0.321               | 0.563       | 0.983                          | 0.961       | 0.896               | 0.769       |
| <i>Fkbp11</i>  | 0.852                          | 0.587       | 0.502               | 0.037       | 0.902                          | 0.961       | 0.717               | 0.889       |
| <i>Fkbp5</i>   | 0.964                          | 0.248       | 0.891               | 0.000       | 0.821                          | 0.795       | 0.326               | 0.256       |
| <i>Gmpr</i>    | 0.723                          | 0.936       | 0.187               | 0.782       | 0.886                          | 0.877       | 0.531               | 0.496       |
| <i>Gnmt</i>    | 0.391                          | 0.174       | 0.004               | 0.000       | 0.862                          | 0.568       | 0.547               | 0.055       |
| <i>Grb10</i>   | 0.641                          | 0.579       | 0.057               | 0.023       | 0.728                          | 0.657       | 0.284               | 0.162       |
| <i>Greb1</i>   | 0.178                          | 0.112       | 0.002               | 0.000       | 0.946                          | 0.948       | 0.892               | 0.896       |
| <i>Gsdma1</i>  | 0.093                          | 0.208       | 0.000               | 0.000       | 0.903                          | 0.968       | 0.806               | 0.937       |
| <i>Hapln4</i>  | 0.912                          | 0.266       | 0.822               | 0.005       | 0.893                          | 0.962       | 0.777               | 0.922       |
| <i>Herc3</i>   | 0.760                          | 0.716       | 0.191               | 0.116       | 0.941                          | 0.711       | 0.807               | 0.183       |
| <i>Hif1a</i>   | 0.796                          | 0.572       | 0.428               | 0.064       | 0.976                          | 0.999       | 0.876               | 0.995       |
| <i>Hmgcr</i>   | 0.973                          | 0.596       | 0.879               | 0.011       | 0.836                          | 0.801       | 0.462               | 0.364       |
| <i>Hmgcs1</i>  | 0.536                          | 0.535       | 0.063               | 0.076       | 0.920                          | 0.774       | 0.861               | 0.593       |
| <i>Insig2</i>  | 0.911                          | 1.543       | 0.524               | 0.008       | 0.866                          | 0.680       | 0.658               | 0.243       |
| <i>Iqgap2</i>  | 0.824                          | 0.377       | 0.547               | 0.007       | 0.937                          | 0.977       | 0.790               | 0.924       |
| <i>Ldha</i>    | 1.104                          | 1.011       | 0.633               | 0.959       | 0.866                          | 0.948       | 0.441               | 0.775       |
| <i>Limk2</i>   | 0.791                          | 0.795       | 0.375               | 0.386       | 0.955                          | 0.804       | 0.831               | 0.325       |
| <i>Map2k4</i>  | 0.982                          | 1.261       | 0.956               | 0.493       | 0.947                          | 0.952       | 0.777               | 0.796       |

Supplementary Table 3. Fold changes of mRNA expression of AR-dependent genes in mouse *Pten*-deficient prostate cancer (continued)

| Gene            | CNPC                           |       |                     |       | CRPC                           |       |                     |       |
|-----------------|--------------------------------|-------|---------------------|-------|--------------------------------|-------|---------------------|-------|
|                 | Linear fold change vs Ctrl Unt |       | p-Value vs Ctrl Unt |       | Linear fold change vs Ctrl Unt |       | p-Value vs Ctrl Unt |       |
|                 | Ctrl ASO                       | ISIS  | Ctrl ASO            | ISIS  | Ctrl ASO                       | ISIS  | Ctrl ASO            | ISIS  |
| <i>Mapre2</i>   | 0.831                          | 0.988 | 0.409               | 0.957 | 0.931                          | 0.821 | 0.725               | 0.341 |
| <i>Mat2a</i>    | 0.652                          | 0.284 | 0.107               | 0.000 | 0.990                          | 0.760 | 0.971               | 0.320 |
| <i>Mfsd2</i>    | 0.598                          | 0.130 | 0.099               | 0.000 | 0.828                          | 0.549 | 0.468               | 0.033 |
| <i>Mki67</i>    | 0.697                          | 0.348 | 0.138               | 0.000 | 0.838                          | 0.642 | 0.300               | 0.018 |
| <i>Mme</i>      | 0.866                          | 0.227 | 0.514               | 0.000 | 0.874                          | 0.365 | 0.664               | 0.005 |
| <i>Mthfd2</i>   | 0.612                          | 0.139 | 0.236               | 0.000 | 0.956                          | 0.939 | 0.900               | 0.867 |
| <i>Myc</i>      | 1.036                          | 0.763 | 0.919               | 0.464 | 0.863                          | 0.543 | 0.742               | 0.186 |
| <i>Ndgr1</i>    | 0.572                          | 0.817 | 0.086               | 0.515 | 0.751                          | 0.647 | 0.524               | 0.336 |
| <i>Nelf</i>     | 0.697                          | 0.646 | 0.065               | 0.029 | 0.978                          | 0.808 | 0.947               | 0.527 |
| <i>Nkx3-1</i>   | 0.321                          | 0.122 | 0.000               | 0.000 | 0.590                          | 0.724 | 0.340               | 0.568 |
| <i>Parp1</i>    | 0.710                          | 0.707 | 0.200               | 0.196 | 0.948                          | 0.983 | 0.740               | 0.913 |
| <i>Pdia4</i>    | 0.837                          | 0.472 | 0.362               | 0.001 | 0.945                          | 0.908 | 0.846               | 0.738 |
| <i>Pdk4</i>     | 0.507                          | 0.593 | 0.170               | 0.285 | 0.903                          | 0.811 | 0.751               | 0.514 |
| <i>Pdlim2</i>   | 0.869                          | 0.374 | 0.267               | 0.000 | 0.952                          | 0.714 | 0.904               | 0.412 |
| <i>Pfkfb4</i>   | 0.751                          | 0.428 | 0.337               | 0.010 | 0.860                          | 0.772 | 0.406               | 0.165 |
| <i>Pgam1</i>    | 0.776                          | 1.018 | 0.651               | 0.974 | 0.870                          | 0.600 | 0.842               | 0.489 |
| <i>Phf19</i>    | 0.227                          | 0.105 | 0.019               | 0.002 | 0.939                          | 0.611 | 0.911               | 0.452 |
| <i>Pkd2l1</i>   | 1.010                          | 1.042 | 0.981               | 0.924 | 0.700                          | 0.781 | 0.224               | 0.413 |
| <i>Pkm2</i>     | 0.237                          | 0.341 | 0.002               | 0.011 | 0.946                          | 0.834 | 0.893               | 0.672 |
| <i>Ppara</i>    | 0.685                          | 0.799 | 0.338               | 0.565 | 0.843                          | 0.821 | 0.633               | 0.598 |
| <i>Ppargc1a</i> | 0.666                          | 0.871 | 0.187               | 0.645 | 0.921                          | 0.800 | 0.630               | 0.204 |
| <i>Psmd1</i>    | 0.952                          | 0.878 | 0.889               | 0.709 | 0.988                          | 0.892 | 0.960               | 0.642 |
| <i>Psph</i>     | 1.435                          | 1.665 | 0.413               | 0.253 | 0.834                          | 0.772 | 0.646               | 0.513 |
| <i>Rasgrf1</i>  | 0.446                          | 0.323 | 0.060               | 0.016 | 0.868                          | 0.819 | 0.575               | 0.452 |
| <i>Scd4</i>     | 0.543                          | 0.231 | 0.319               | 0.025 | 0.507                          | 0.550 | 0.323               | 0.430 |
| <i>Sgk1</i>     | 1.482                          | 0.424 | 0.177               | 0.008 | 0.932                          | 0.740 | 0.750               | 0.189 |
| <i>Sgk3</i>     | 0.680                          | 0.780 | 0.273               | 0.475 | 0.812                          | 0.787 | 0.328               | 0.262 |
| <i>Slc2a4</i>   | 0.395                          | 0.425 | 0.004               | 0.009 | 0.701                          | 0.339 | 0.619               | 0.161 |
| <i>Slc38a5</i>  | 0.584                          | 0.121 | 0.153               | 0.000 | 0.724                          | 0.491 | 0.726               | 0.472 |
| <i>Slc40a1</i>  | 0.745                          | 1.057 | 0.387               | 0.869 | 1.000                          | 0.900 | 0.999               | 0.584 |
| <i>Sqle</i>     | 1.047                          | 0.530 | 0.886               | 0.064 | 0.903                          | 0.832 | 0.723               | 0.526 |
| <i>Stk39</i>    | 0.724                          | 0.426 | 0.452               | 0.059 | 0.861                          | 0.760 | 0.748               | 0.558 |
| <i>Tax1bp1</i>  | 0.762                          | 0.988 | 0.290               | 0.961 | 0.854                          | 0.873 | 0.195               | 0.259 |
| <i>Timp4</i>    | 1.332                          | 0.232 | 0.421               | 0.001 | 0.861                          | 0.949 | 0.375               | 0.751 |
| <i>Tmem45a</i>  | 0.642                          | 0.766 | 0.275               | 0.508 | 0.901                          | 0.891 | 0.644               | 0.609 |
| <i>Tmem97</i>   | 0.538                          | 0.531 | 0.012               | 0.011 | 0.928                          | 0.752 | 0.675               | 0.122 |
| <i>Tmprss2</i>  | 0.751                          | 0.607 | 0.059               | 0.003 | 0.991                          | 0.825 | 0.976               | 0.503 |
| <i>Tpd52</i>    | 1.804                          | 2.958 | 0.703               | 0.465 | 0.854                          | 0.632 | 0.786               | 0.453 |
| <i>Twist1</i>   | 0.599                          | 1.110 | 0.293               | 0.835 | 0.956                          | 0.486 | 0.904               | 0.082 |
| <i>Ube2c</i>    | 0.378                          | 0.479 | 0.020               | 0.078 | 0.775                          | 0.538 | 0.699               | 0.374 |
| <i>Uso1</i>     | 1.045                          | 0.506 | 0.879               | 0.032 | 0.887                          | 0.988 | 0.652               | 0.964 |
| <i>Wwtr1</i>    | 0.924                          | 0.770 | 0.905               | 0.693 | 0.720                          | 0.671 | 0.391               | 0.379 |
| <i>Zfp36l1</i>  | 0.702                          | 0.858 | 0.134               | 0.501 | 0.891                          | 0.707 | 0.676               | 0.219 |

Supplementary Table 4. Summary of mouse characteristics and treatment responses for CNPC treated mice

| Description                   | Ctrl veh     | Ctrl ASO    | ISIS581088  | Orch.       | P-value |
|-------------------------------|--------------|-------------|-------------|-------------|---------|
| No. of Mice                   | 8            | 7           | 7           | 9           |         |
| Median start age (w)          | 56.9         | 52.9        | 58.4        | 49.9        | 0.957   |
| <i>range</i>                  | (39-83.9)    | (42.4-61.4) | (43.4-66.4) | (39.4-67.1) |         |
| Median initial bodyweight (g) | 35.9         | 35.9        | 35.7        | 34.9        | 0.817   |
| <i>range</i>                  | (31.3-44.2)  | (31.9-49.0) | (32.4-41.4) | (28.5-57.3) |         |
| Median bodyweight change (%)  | -13.9        | -10.3       | -12.2       | -6.7        | 0.187   |
| <i>range</i>                  | (-26.3-17.5) | (-17.8-8.8) | (-20.2-9.9) | (-29.2-4.2) |         |
| Median GUT weight (g)         | 2.5          | 2.7         | 3.7         | 3.2         | 0.853   |
| <i>range</i>                  | (1.2-9.3)    | (2.4-8.9)   | (1.3-7.3)   | (1.3-7.0)   |         |
| Metastatic incidence (%)      | 22.2         | 40          | 20          | 33.3        | 0..915  |
| <i>frequency</i>              | (2/7)        | (2/5)       | (1/5)       | (3/9)       |         |
| Median GUT weight (g)         | 3            | 3           | 2           | 2           | 0.365   |
| <i>range</i>                  | (2-3)        | (1-3)       | (1-3)       | (1-3)       |         |



Supplementary Table 5. Summary of mouse characteristics and treatment responses

| Description                                 | Ctrl veh     | Ctrl ASO     | ISIS581088   | AZD5363     | ISIS581088 + AZD5363 | P-value |
|---------------------------------------------|--------------|--------------|--------------|-------------|----------------------|---------|
| No. of Mice                                 | 11           | 8            | 8            | 8           | 10                   |         |
| Median start age (w)                        | 55.4         | 61.6         | 49           | 63.4        | 60.1                 | 0.167   |
| <i>range</i>                                | (45.9-78.9)  | (42.4-65.4)  | 42.4-70.9)   | 52.6-73.9)  | (48.4-70.9)          |         |
| Median initial bodyweight (g)               | 34.3         | 33.5         | 35.3         | 34.2        | 35.7                 | 0.847   |
| <i>range</i>                                | (32.1-38.0)  | (30.6-43.6)  | (33.4-41.9)  | (32.0-38.5) | (31.3-38.9)          |         |
| Median bodyweight change (%)                | 0.6          | -3.3         | -3.3         | 0.1         | -7                   | 0.369   |
| <i>range</i>                                | (-11.7-17.1) | (-18.2-18.0) | (-18.2-10.0) | (-9.6-12.7) | (-24.3-5.7)          |         |
| Median genitourinary tract (GUT) weight (g) | 3.8          | 2.2          | 5.4          | 2.7         | 3.8                  | 0.264   |
| <i>range</i>                                | (1.2-11.9)   | (0.7-7.1)    | (1.1-11.8)   | (0.9-5.9)   | (0.3-8.7)            |         |
| Metastatic incidence (%)                    | 36.4         | 50           | 37.5         | 37.5        | 50                   | 0.945   |
| <i>frequency</i>                            | (4/11)       | (4/8)        | (3/8)        | (3/8)       | (5/10)               |         |
| # of metastatic lesions/mouse               | 1.5          | 1.5          | 3.3          | 1.7         | 1.6                  | 0.449   |
| <i>range</i>                                | (1-3)        | (1-2)        | (1-7)        | (1-2)       | (1-3)                |         |
| Mean performance score                      | 2.2          | 2.3          | 1.6          | 2.5         | 1.8                  | 0.377   |
| <i>s.e.</i>                                 | 0.3          | 0.4          | 0.4          | 0.3         | 0.2                  |         |

Supplementary Table 6. Multi-cluster gene functional enrichment analyses for mouse CNPC and CRPC after Ar gene silencing with ISIS581088

| Category               | ID          | Title (or Source)                                 | pValues     |             | Gene List                                                                                      |                                                                       |
|------------------------|-------------|---------------------------------------------------|-------------|-------------|------------------------------------------------------------------------------------------------|-----------------------------------------------------------------------|
|                        |             |                                                   | CNPC - logP | CRPC - logP | CNPC                                                                                           | CRPC                                                                  |
| GO: Biological Process | GO: 0055114 | oxidation-reduction process                       | 10.0000     | 5.8407      | <i>AKR1B1 ALDH1L2 DHCR24 DHCR7 GNMT GRB10 HIF1A HMGCR MTHFD2 PDK4 PFKFB4 PKM SCD5 SQLE</i>     | <i>AKR1B1 ALDH1L2 ALOX12 CYP2F1 GNMT GRB10 MYC PGAM1 SCD5 TWIST1</i>  |
| GO: Biological Process | GO: 0051186 | cofactor metabolic process                        | 10.0000     | 5.6186      | <i>AKR1B1 ALDH1L2 ANK1 GNMT HIF1A HMGCR MAT2A MTHFD2 PDK4 PFKFB4 PKM SCD5 TSPO SCD5</i>        | <i>AKR1B1 ALDH1L2 ANK1 GNMT MYC PGAM1</i>                             |
| GO: Biological Process | GO: 0006695 | cholesterol biosynthetic process                  | 10.0000     |             | <i>DHCR24 DHCR7 HMGCR HMGCS1 SQLE</i>                                                          |                                                                       |
| GO: Biological Process | GO: 0009628 | response to abiotic stimulus                      | 10.0000     |             | <i>AKR1B1 DNAJC3 EPAS1 HIF1A HMGCR HMGCS1 MKI67 MME NKX3-1 NSMF PKM SGK1 SLC2A4 STK39 TSPO</i> |                                                                       |
| GO: Biological Process | GO: 0032787 | monocarboxylic acid metabolic process             |             | 10.0000     |                                                                                                | <i>ALOX12 CRABP1 CYP2F1 GNMT INSIG2 MYC PGAM1 SCD5 TWIST1</i>         |
| GO: Biological Process | GO: 0016126 | sterol biosynthetic process                       | 10.0000     |             | <i>DHCR24 DHCR7 HMGCR HMGCS1 SQLE</i>                                                          |                                                                       |
| GO: Biological Process | GO: 0006732 | coenzyme metabolic process                        | 10.0000     |             | <i>ALDH1L2 GNMT HIF1A HMGCR MAT2A MTHFD2 PDK4 PFKFB4 PKM SCD5</i>                              |                                                                       |
| GO: Biological Process | GO: 0044283 | small molecule biosynthetic process               | 10.0000     |             | <i>AKR1B1 DHCR24 DHCR7 GNMT HIF1A HMGCR HMGCS1 MTHFD2 PDK4 PKM SCD5 SQLE</i>                   |                                                                       |
| GO: Biological Process | GO: 0009725 | response to hormone                               | 10.0000     |             | <i>AKR1B1 DHCR24 GRB10 HIF1A HMGCS1 MAT2A NKX3-1 NSMF PDK4 PKM SGK1 SLC2A4 TIMP4 TSPO</i>      |                                                                       |
| GO: Biological Process | GO: 1902653 | secondary alcohol biosynthetic process            | 10.0000     |             | <i>DHCR24 DHCR7 HMGCR HMGCS1 SQLE</i>                                                          |                                                                       |
| GO: Biological Process | GO: 0006694 | steroid biosynthetic process                      | 10.0000     |             | <i>AKR1B1 DHCR24 DHCR7 HMGCR HMGCS1 SQLE TSPO</i>                                              |                                                                       |
| GO: Biological Process | GO: 0019752 | carboxylic acid metabolic process                 |             | 5.8130      |                                                                                                | <i>ALDH1L2 ALOX12 CRABP1 CYP2F1 GNMT INSIG2 MYC PGAM1 SCD5 TWIST1</i> |
| GO: Biological Process | GO: 0010243 | response to organonitrogen compound               | 5.7496      |             | <i>AKR1B1 GRB10 HIF1A HMGCS1 MAT2A NSMF PDK4 PKM SGK1 SLC2A4 TIMP4 TSPO</i>                    |                                                                       |
| GO: Biological Process | GO: 0018931 | naphthalene metabolic process                     |             | 5.6299      |                                                                                                | <i>AKR1B1 CYP2F1</i>                                                  |
| GO: Biological Process | GO: 0090420 | naphthalene-containing compound metabolic process |             | 5.6299      |                                                                                                | <i>AKR1B1 CYP2F1</i>                                                  |
| GO: Biological Process | GO: 0006730 | one-carbon metabolic process                      | 5.5342      |             | <i>ALDH1L2 GNMT MAT2A MTHFD2</i>                                                               |                                                                       |
| GO: Biological Process | GO: 1901617 | organic hydroxy compound biosynthetic process     | 5.5211      |             | <i>AKR1B1 DHCR24 DHCR7 EPAS1 HMGCR HMGCS1 SQLE</i>                                             |                                                                       |
| GO: Biological Process | GO: 0046165 | alcohol biosynthetic process                      | 5.4391      |             | <i>AKR1B1 DHCR24 DHCR7 HMGCR HMGCS1 SQLE</i>                                                   |                                                                       |

Supplementary Table 6. Multi-cluster gene functional enrichment analyses for mouse CNPC and CRPC after *Ar* gene silencing with ISIS581088 (continued)

| Category               | ID                | Title (or Source)                                                                                                               | pValues     |             | Gene List                                                            |                                                                       |
|------------------------|-------------------|---------------------------------------------------------------------------------------------------------------------------------|-------------|-------------|----------------------------------------------------------------------|-----------------------------------------------------------------------|
|                        |                   |                                                                                                                                 | CNPC - logP | CRPC - logP | CNPC                                                                 | CRPC                                                                  |
| GO: Biological Process | GO: 0043436       | oxoacid metabolic process                                                                                                       |             | 5.4020      |                                                                      | <i>ALDH1L2 ALOX12 CRABP1 CYP2F1 GNMT INSIG2 MYC PGAM1 SCD5 TWIST1</i> |
| GO: Biological Process | GO: 0019318       | hexose metabolic process                                                                                                        | 5.2283      |             | <i>AKR1B1 GNMT GRB10 HIF1A PDK4 PFKFB4 PKM</i>                       |                                                                       |
| GO: Biological Process | GO: 1901657       | glycosyl compound metabolic process                                                                                             | 4.7909      |             | <i>AKR1B1 GNMT HIF1A HMGCR MAT2A PFKFB4 PKM TSPO</i>                 |                                                                       |
| GO: Biological Process | GO: 0005975       | carbohydrate metabolic process                                                                                                  |             | 4.5789      |                                                                      | <i>ABO AKR1B1 DERL3 GNMT GRB10 MYC PGAM1 SLC2A4</i>                   |
| Pathway                | SMP 00023         | Steroid Biosynthesis                                                                                                            | 10.0000     |             | <i>DHCR24 HMGCR HMGCS1 SQLE</i>                                      |                                                                       |
| Pathway                | 1270037           | Cholesterol biosynthesis                                                                                                        | 10.0000     |             | <i>DHCR24 DHCR7 HMGCR HMGCS1 SQLE</i>                                |                                                                       |
| Pathway                | 142269            | superpathway of cholesterol biosynthesis                                                                                        | 10.0000     |             | <i>DHCR24 DHCR7 HMGCR HMGCS1 SQLE</i>                                |                                                                       |
| Coexpression           | M2571             | Genes dn-regulated during prostate cancer progression in the JOCK1 model due to inducible activation of FGFR1 gene in prostate. | 10.0000     | 5.7103      | <i>ACTG2 CRABP1 GNMT GREB1 GSDMA MAT2A MTHFD2 PHF19 SLC2A4 TIMP4</i> | <i>ACTG2 CRABP1 GNMT NDRG1 PHF19 SLC2A4</i>                           |
| Coexpression           | 12734205-TableS4  | Human Ovarian Wood03 142genes                                                                                                   |             | 10.0000     |                                                                      | <i>ACTG2 MME MYC SCD5 TWIST1</i>                                      |
| Coexpression           | M5908             | Genes defining response to androgens.                                                                                           | 10.0000     |             | <i>DHCR24 FKBP5 HMGCR HMGCS1 IQGAP2 NKX3-1 SGK1 STK39 TMPRSS2</i>    |                                                                       |
| Coexpression           | M2672             | Genes up-regulated by everolimus [PubChem = 6442177] in prostate tissue.                                                        | 10.0000     |             | <i>DHCR24 DHCR7 GSDMA HMGCS1 SQLE TMEM97 UBE2C</i>                   |                                                                       |
| Coexpression           | 12606954-table1b  | Human Prostate Bigler03 11genes                                                                                                 | 5.7837      |             | <i>FKBP5 IQGAP2 TMPRSS2</i>                                          |                                                                       |
| Coexpression           | 16707422-tableS1a | Human Prostate Hendriksen06 163genes                                                                                            | 5.3977      |             | <i>DHCR24 FKBP5 HMGCR STK39 TMPRSS2</i>                              |                                                                       |
| Coexpression           | 20386565-TableS1  | Human Prostate Zhao10 1841genes                                                                                                 | 5.0856      |             | <i>ACTG2 DHCR7 GREB1 HIF1A IQGAP2 MTHFD2 PDIA4 TMEM97 UBE2C</i>      |                                                                       |

Supplementary Table 6. Multi-cluster gene functional enrichment analyses for mouse CNPC and CRPC after *Ar* gene silencing with ISIS581088 (continued)

| Category     | ID               | Title (or Source)                                             | pValues     |             | Gene List                                                                                  |                                                                    |
|--------------|------------------|---------------------------------------------------------------|-------------|-------------|--------------------------------------------------------------------------------------------|--------------------------------------------------------------------|
|              |                  |                                                               | CNPC - logP | CRPC - logP | CNPC                                                                                       | CRPC                                                               |
| Coexpression | M8124            | Genes up-regulated in basal subtype of breast cancer samples. |             | 4.9268      |                                                                                            | <i>ACTG2 CRABP1 CXCL11 MKI67 MYC NDRG1 WWTR1</i>                   |
| Coexpression | 15899800-TableS1 | Human Breast Martens05 117genes                               |             | 4.8879      |                                                                                            | <i>AKR1B1 MKI67 MYC NDRG1</i>                                      |
| Drug         | C053541          | bicalutamide                                                  | 5.3787      |             | <i>FKBP11 GREB1 MKI67 MME NKX3-1 TMPRSS2</i>                                               |                                                                    |
| Disease      | u/mls: C0282612  | Prostatic Intraepithelial Neoplasias                          | 5.6325      | 5.6099      | <i>MKI67 MME NKX3-1 SGK1 TMPRSS2 TSPO</i>                                                  | <i>ALOX12 MKI67 MME MYC NDRG1</i>                                  |
| Disease      | u/mls: C0001430  | Adenoma                                                       |             | 5.7515      |                                                                                            | <i>AKR1B1 ALOX12 CRABP1 MKI67 MME MYC NDRG1 TPD52 TWIST1 UBE2C</i> |
| Disease      | u/mls: C1134719  | Invasive Ductal Breast Carcinoma                              |             | 5.6668      |                                                                                            | <i>ABO INSIG2 MKI67 MYC TWIST1 UBE2C</i>                           |
| Disease      | u/mls: C0033578  | Prostatic Neoplasms                                           | 5.2857      |             | <i>ABO DNAJC3 FKBP5 GNMT GREB1 HIF1A MME NKX3-1 SQLE TIMP4 TMPRSS2 TSPO USO1</i>           |                                                                    |
| Disease      | u/mls: C0677886  | Epithelial ovarian cancer                                     |             | 5.2539      |                                                                                            | <i>ABO AKR1B1 ALOX12 GRB10 MKI67 MYC SLC2A4 TWIST1 UBE2C WWTR1</i> |
| Disease      | u/mls: C0023903  | Liver neoplasms                                               | 5.1997      |             | <i>CRABP1 EPAS1 GNMT HIF1A HMGCR HMGCS1 IQGAP2 MAT2A PDK4 PKM RASGRF1 SGK1 SLC2A4 SQLE</i> |                                                                    |
| Disease      | u/mls: C0005695  | Bladder Neoplasm                                              |             | 4.8533      |                                                                                            | <i>ABO MKI67 MME MYC NDRG1 TWIST1</i>                              |
| Disease      | u/mls: C0023453  | Leukemia, Lymphocytic, Acute, L2                              |             | 4.7606      |                                                                                            | <i>MME MYC</i>                                                     |
| Disease      | u/mls: C0746787  | Cancer of Neck                                                | 4.5686      |             | <i>EPAS1 HIF1A</i>                                                                         |                                                                    |
| Disease      | u/mls: C0345904  | Malignant neoplasm of liver                                   |             | 4.3702      |                                                                                            | <i>ABO AKR1B1 CAMKK2 CXCL11 GNMT MYC PGAM1</i>                     |
| Disease      | u/mls: C1511306  | Breast Diffuse Large B-Cell Lymphoma                          |             | 4.3636      |                                                                                            | <i>MKI67 MME</i>                                                   |

Supplementary Table 7. Antibody List

Antibodies for western blot assays

| Marker            | Source         | Catalogue number | Predicated Band size | Dilution | 2° antibody | Reference                                                                                                                                                   |
|-------------------|----------------|------------------|----------------------|----------|-------------|-------------------------------------------------------------------------------------------------------------------------------------------------------------|
| AR (NTD)          | Thermo         | RB-9030          | 110                  | 1:1000   | Rabbit      |                                                                                                                                                             |
| AR (T660)         | R&D Systems    | MAB58761         | 110                  | 1:1000   | Mouse       |                                                                                                                                                             |
| Cleaved Caspase-3 | Cell Signaling | 9661             | 17,19                | 1:1000   | Rabbit      | <a href="https://www.antibodypedia.com/gene/1222/CASP3/antibody/108063/9661">https://www.antibodypedia.com/gene/1222/CASP3/antibody/108063/9661</a>         |
| Akt               | Cell Signaling | 9272             | 60                   | 1:1000   | Rabbit      | <a href="https://www.antibodypedia.com/gene/135/AKT1/antibody/166716/9272">https://www.antibodypedia.com/gene/135/AKT1/antibody/166716/9272</a>             |
| P-Akt             | Cell Signaling | 4060             | 60                   | 1:1000   | Rabbit      | <a href="https://www.antibodypedia.com/gene/135/AKT1/antibody/106995/4060">https://www.antibodypedia.com/gene/135/AKT1/antibody/106995/4060</a>             |
| P-PRAS40          | Cell Signaling | 13175            | 80                   | 1:1000   | Rabbit      | <a href="https://www.antibodypedia.com/gene/32195/AKT1S1/antibody/1286783/13175">https://www.antibodypedia.com/gene/32195/AKT1S1/antibody/1286783/13175</a> |
| P-S6              | Cell Signaling | 2211             | 32                   | 1:1000   | Rabbit      | <a href="https://www.antibodypedia.com/gene/3412/RPS6/antibody/105615/2211">https://www.antibodypedia.com/gene/3412/RPS6/antibody/105615/2211</a>           |
| GAPDH             | Cell Signaling | 2118             | 37                   | 1:10000  | Rabbit      | <a href="https://www.antibodypedia.com/gene/3923/GAPDH/antibody/105543/2118">https://www.antibodypedia.com/gene/3923/GAPDH/antibody/105543/2118</a>         |

Antibodies For IHC

| Marker            | Source                   | Catalogue number | Antigen retrieval | Dilution | 2° antibody | Reference                                                                                                                                                   |
|-------------------|--------------------------|------------------|-------------------|----------|-------------|-------------------------------------------------------------------------------------------------------------------------------------------------------------|
| ASO               | Ionis Pharmaceuticals    | na               |                   | 1:100    | Rabbit      | See reference no. 27                                                                                                                                        |
| AR (NTD)          | Thermo Fisher Scientific | RB-9030          | Dako ARS          | 1:100    | Rabbit      |                                                                                                                                                             |
| AR (S650)         | Abcam                    | AB-47570         | Dako ARS          | 1:100    | Rabbit      |                                                                                                                                                             |
| Cleaved Caspase-3 | Cell Signaling           | 9661             | Dako ARS          | 1:400    | Rabbit      | <a href="https://www.antibodypedia.com/gene/1222/CASP3/antibody/108063/9661">https://www.antibodypedia.com/gene/1222/CASP3/antibody/108063/9661</a>         |
| Ki67              | Thermo Fisher Scientific | RB-9043          | Dako ARS          | 1:250    | Rabbit      | <a href="https://www.antibodypedia.com/gene/741/MKI67/antibody/630324/PA5-16446">https://www.antibodypedia.com/gene/741/MKI67/antibody/630324/PA5-16446</a> |

DAKO ARS: 20 min steam heating in DAKO Target retrieval solution (S1699, Agilent, Santa Clara, CA)



Supplementary Table 8. List of PCR primers used for qRT-PCR

| Target               | Strand  | Sequence                  | Source       |
|----------------------|---------|---------------------------|--------------|
| <i>Ar</i>            | Forward | TTGGACAGTACCAGGGACCA      | PrimerBlast  |
| <i>Exon 2</i>        | Reverse | GAGAGCTCCGTAGTGACAGC      |              |
| <i>Ar</i>            | Forward | GGATGCTCTACTTTGCACCTGA    | PrimerBlast  |
| <i>Exon 5/6 junc</i> | Reverse | AGGTGCCTCATCCTCACACA      |              |
| <i>Ar</i>            | Forward | CCAGTGGATGGGCTGAAAAAT     | PrimerBlast  |
| <i>Exon 7</i>        | Reverse | CCTTGAGCAGGATGTGGGATT     |              |
| <i>Bcl2</i>          | Forward | AGGGTCTTCAGAGACAGCCA      | qPrimerDepot |
|                      | Reverse | AGTACCTGAACCGGCATCTG      |              |
| <i>Casp3</i>         | Forward | GACTTGCTCCCATGTATGGTC     | qPrimerDepot |
|                      | Reverse | ATCAAAGCGCAGTGTCTCTG      |              |
| <i>Fkbp5</i>         | Forward | CCAACAACGAACACCACATC      | qPrimerDepot |
|                      | Reverse | CGAGGGATACTCAAACCCAA      |              |
| <i>Gapdh</i>         | Forward | CGAACGGGAAGCTCACTGGCAT    | qPrimerDepot |
|                      | Reverse | TCAGATGCCTGCTTCACCACCT    |              |
| <i>Igf1</i>          | Forward | CACTCATCCACAATGCCTGT      | qPrimerDepot |
|                      | Reverse | TGGATGCTCTTCAGTTCGTG      |              |
| <i>Igf1r</i>         | Forward | CAGCACTCGTTGTTCTCGGT      | qPrimerDepot |
|                      | Reverse | AGCCCATGTGTGAGAAGACC      |              |
| <i>Klk4</i>          | Forward | CTTGATGATCCGGCTGCTG       | qPrimerDepot |
|                      | Reverse | AGCCAACATGATGGTCACTG      |              |
| <i>Mki67</i>         | Forward | CCATCTGAGGCAGGGCTATC      | PrimerBlast  |
|                      | Reverse | TTTCATATTTATTGCCAAGATGGGG |              |
| <i>Msmb</i>          | Forward | ACAGGTCTCCCTGGGTTCT       | qPrimerDepot |
|                      | Reverse | CGTCAATCACCTGCTGTACC      |              |
| <i>Myc</i>           | Forward | TGAAGTTCACGTTGAGGGG       | qPrimerDepot |
|                      | Reverse | AGAGCTCCTCGAGCTGTTTG      |              |
| <i>Nkx3.1</i>        | Forward | CACTTGCTAAGTCCCCTGGA      | qPrimerDepot |
|                      | Reverse | AGTATCCGGCATAGCCCC        |              |
| <i>Stat3</i>         | Forward | CTGCTCCAGGTAGCGTGTGT      | qPrimerDepot |
|                      | Reverse | CTCAGCCCCGAGACAGT         |              |
| <i>Timp4</i>         | Forward | GGGCTCAATGTAGTTGCACA      | qPrimerDepot |
|                      | Reverse | AGAAACCAACAGTCACAAGCA     |              |
| <i>Tmprss2</i>       | Forward | CTCCCGTAGCTCTCACTCCA      | qPrimerDepot |
|                      | Reverse | CCCAACGGAGAAGATGAGAA      |              |
